# Supplementary material for: Impact of Drying Processes on Phenolics and In Vitro Health-Related Activities of Indigenous Plants in Thailand
Source: MDPI journal article supplement (doi:10.3390/plants11030294), 2022-01-22
Supplement: s1 [file s1]

## Supplementary materials

# Impact of Drying Processes on Phenolics and In Vitro Health-Related Activities of Indigenous Plants in Thailand

Pandaree Sirichai <sup>1</sup>, Suwapat Kittibunchakul <sup>1</sup>, Sirinapa Thangsiri <sup>1</sup>, Nattira On-Nom <sup>1</sup>, Chaowanee Chupeerach <sup>1</sup>, Piya Temviriyankul <sup>1</sup>, Woorawee Inthachai <sup>1</sup>, Onanong Nuchuchua <sup>2</sup>, Amornrat Aursalong <sup>1</sup>, Yuraporn Sahasakul <sup>1</sup>, Somsri Charoenkiatkul <sup>1</sup> and Uthaiwan Suttisansanee <sup>1,\*</sup>

<sup>1</sup> Institute of Nutrition, Mahidol University, Salaya, Phuttamonthon, Nakhon Pathom 73170, Thailand; riceberrii3@gmail.com (P.S.); suwapat.kit@mahidol.ac.th (S.K.); sirinapa.thang@outlook.com (S.T.); nattira.onn@mahidol.ac.th (N.O.-N.); chaowanee.chu@mahidol.ac.th (C.C.); piya.tem@mahidol.ac.th (P.T.); woorawee.int@mahidol.ac.th (W.I.); amornrat.aur@mahidol.ac.th (A.A.); yuraporn.sah@mahidol.ac.th (Y.S.); somsri.chr@mahidol.ac.th (S.C.)

<sup>2</sup> National Nanotechnology Center (NANOTEC), National Science and Technology Development Agency (NSTDA), Klong Luang, Pathum Thani 12120, Thailand; onanong@nanotec.or.th

\* Correspondence: uthaiwan.sut@mahidol.ac.th; Tel.: +66-(0)-2800-2380 (ext. 422)

## Supplementary Table S1:

Fragment ions of twenty-four authentic standards of phenolics using liquid chromatography–electrospray ionization–tandem mass spectrometry (LC-ESI-MS/MS) in selective reaction monitoring (SRM) mode.

| Compounds | Standards                 | Ion mass | Parent ions ( <i>m/z</i> ) | SRM transitions ( <i>m/z</i> ) and collision energy (V) | RF lens (V) |
|-----------|---------------------------|----------|----------------------------|---------------------------------------------------------|-------------|
| 1         | Epigallocatechin gallate  | [M–H]    | 457.175                    | 305.155 (16.84 V), 168.97 (17.59 V), 125.042 (40.30 V)  | 204         |
| 2         | Gallic acid               | [M–H]    | 169.05                     | 124.988 (14.56 V), 96.917 (18.77 V), 79.185 (22.94 V)   | 147         |
| 3         | 3,4-Dihydroxybenzoic acid | [M–H]    | 152.95                     | 109.113 (14.35 V), 81.042 (20.50 V), 91.042 (24.59 V)   | 128         |
| 4         | Chlorogenic acid          | [M–H]    | 353.075                    | 179.042 (14.06 V), 191.000 (16.54 V), 85.095 (39.96 V)  | 148         |
| 5         | 4-Hydroxybenic acid       | [M–H]    | 137.05                     | 92.970 (14.86 V), 65.000 (29.39 V), 75.000 (31.96 V)    | 110         |
| 6         | Caffeic acid              | [M–H]    | 179.038                    | 135.054 (15.07 V), 107.071 (22.57 V), 85.042 (31.96 V)  | 151         |
| 7         | Syringic acid             | [M–H]    | 197.138                    | 182.185 (13.72 V), 167.113 (19.24 V), 123.095 (22.31 V) | 130         |
| 8         | Vanillic acid             | [M–H]    | 167.000                    | 123.042 (11.66 V), 151.97 (14.59 V), 108.042 (18.65 V)  | 114         |
| 9         | <i>p</i> -Coumaric acid   | [M+H]    | 165.05                     | 147.054 (11.70 V), 119.113 (19.36 V), 91.125 (25.89 V)  | 90          |
| 10        | Rutin                     | [M+H]    | 611.20                     | 303.13 (20.80), 465.20 (12.71V)                         | 198         |
| 11        | Sinapic acid              | [M–H]    | 223.25                     | 208.125 (13.51 V), 164.024 (15.78 V), 192.970 (22.65 V) | 141         |
| 12        | Ferulic acid              | [M–H]    | 192.95                     | 149.125 (11.28 V), 177.970 (13.05 V), 134.042 (16.50 V) | 124         |
| 13        | Hesperidin                | [M–H]    | 609.30                     | 301.179 (24.50 V), 325.179 (27.83 V), 286.125 (41.60 V) | 299         |
| 14        | Myricetin                 | [M–H]    | 317.088                    | 178.970 (19.53 V), 150.988 (24.50 V), 137.113 (26.86 V) | 245         |
| 15        | Rosmarinic acid           | [M–H]    | 359.20                     | 197.000 (15.70 V), 161.113 (17.38 V), 133.054 (37.81 V) | 175         |
| 16        | Luteolin                  | [M–H]    | 285.138                    | 197.000 (15.70 V), 161.113 (17.38 V), 133.054 (37.81 V) | 241         |
| 17        | Quercetin                 | [M–H]    | 301.200                    | 178.976 (18.18 V), 273.125 (19.45 V), 151.042 (21.39 V) | 237         |
| 18        | Cinnamic acid             | [M–H]    | 147.00                     | 103.00 (11.23V), 77.083 (23.07)                         | 107         |
| 19        | Apigenin                  | [M–H]    | 269.075                    | 116.863 (34.28 V), 149.071 (25.13 V), 151.131 (25.05 V) | 244         |
| 20        | Genistein                 | [M–H]    | 269.138                    | 224.054 (25.60 V), 159.054 (29.26 V), 132.929 (30.95 V) | 239         |
| 21        | Naringenin                | [M+H]    | 272.938                    | 146.97 (21.01 V), 153.054 (24.42 V), 119.000 (31.28 V)  | 160         |

---

**Supplementary Table S1 (Cont.):**

Fragment ions of twenty-four authentic standards of phenolics using liquid chromatography–electrospray ionization–tandem mass spectrometry (LC-ESI-MS/MS) in selective reaction monitoring (SRM) mode.

| Compounds | Standards    | Ion mass | Parent ions ( <i>m/z</i> ) | SRM transitions ( <i>m/z</i> ) and collision energy (V) | RF lens (V) |
|-----------|--------------|----------|----------------------------|---------------------------------------------------------|-------------|
| 22        | Kaempferol   | [M–H]    | 285.150                    | 184.911 (25.85 V), 239.113 (27.03 V), 186.988 (28.17 V) | 260         |
| 23        | Isorhamnetin | [M–H]    | 315.088                    | 300.000 (21.30 V), 150.970 (29.14 V), 271.054 (30.57 V) | 233         |
| 24        | Galangin     | [M+H]    | 271.088                    | 165.042 (28.80 V), 197.125 (31.75 V), 153.113 (32.42 V) | 248         |

## Supplementary Table S2:

The validation parameters of twenty-four authentic standards of phenolics using liquid chromatography–electrospray ionization–tandem mass spectrometry (LC-ESI-MS/MS) in selective reaction monitoring (SRM) mode.

| Compounds | Retention time (min) | Standards                 | Linear range (µg/mL) | Linear regression equation | Correlation coefficient (R <sup>2</sup> ) | LOD (µg/mL) | LOQ (µg/mL) | %RSD (Inter-day) | %Recovery         |                      |                    |
|-----------|----------------------|---------------------------|----------------------|----------------------------|-------------------------------------------|-------------|-------------|------------------|-------------------|----------------------|--------------------|
|           |                      |                           |                      |                            |                                           |             |             |                  | Low level (µg/mL) | Medium level (µg/mL) | High level (µg/mL) |
| 1         | 0.44                 | Epigallocatechin gallate  | 0.125–40             | y = 8533x + 1053.4         | 0.9985                                    | 0.067       | 0.230       | 0.023            | 91.84             | 85.36                | 91.37              |
| 2         | 0.564                | Gallic acid               | 0.195–25             | y = 3323.1x – 2100.4       | 0.9984                                    | 0.04        | 0.14        | 0.01             | 113.05            | 118.57               | 109.12             |
| 3         | 0.803                | 3,4-Dihydroxybenzoic acid | 0.195–25             | y = 11490x – 10877         | 0.9935                                    | 0.010       | 0.034       | 0.003            | 90.59             | 85.75                | 89.75              |
| 4         | 0.922                | Chlorogenic acid          | 0.3125–40            | y = 8377.5x – 3623.5       | 0.9934                                    | 0.017       | 0.055       | 0.006            | 91.94             | 87.50                | 95.02              |
| 5         | 1.16                 | 4-Hydroxybenic acid       | 0.3125–40            | y = 2482.6x – 3998.4       | 0.9917                                    | 0.027       | 0.090       | 0.009            | 109.67            | 103.60               | 101.28             |
| 6         | 1.40                 | Caffeic acid              | 0.3125–40            | y = 12328x – 19725         | 0.9918                                    | 0.010       | 0.035       | 0.003            | 105.36            | 93.98                | 87.41              |
| 7         | 1.539                | Syringic acid             | 3.125–100            | y = 68.091x + 230.43       | 0.9955                                    | 0.582       | 1.939       | 0.194            | 116.35            | 97.42                | 94.91              |
| 8         | 1.63                 | Vanillic acid             | 2.5–100              | y = 213.67x – 975.72       | 0.9900                                    | 0.15        | 0.48        | 0.05             | 99.86             | 101.76               | 100.12             |
| 9         | 2.452                | <i>p</i> -Coumaric acid   | 0.3125–40            | y = 8532.4x – 13559        | 0.9910                                    | 0.013       | 0.042       | 0.004            | 88.22             | 81.36                | 98.05              |
| 10        | 2.737                | Rutin                     | 0.009–1.25           | y = 49729x – 33.064        | 0.9999                                    | 0.001       | 0.005       | 0.0005           | 94.63             | 114.00               | 108.73             |
| 11        | 2.772                | Sinapic acid              | 0.39–25              | y = 1592.6x – 832.22       | 0.9977                                    | 0.026       | 0.086       | 0.009            | 81.34             | 92.16                | 84.22              |
| 12        | 2.851                | Ferulic acid              | 1.56–100             | y = 559.03x – 1819.2       | 0.9947                                    | 0.155       | 0.518       | 0.052            | 91.51             | 89.24                | 93.10              |
| 13        | 3.41                 | Hesperidin                | 0.25–40              | y = 838.63x – 242.2        | 0.9986                                    | 0.07        | 0.22        | 0.02             | 100.43            | 104.06               | 108.60             |
| 14        | 3.431                | Myricetin                 | 1.25–40              | y = 303.47x – 601.81       | 0.9976                                    | 0.261       | 0.871       | 0.087            | 113.07            | 81.77                | 91.12              |
| 15        | 3.528                | Rosmarinic acid           | 0.3125–40            | y = 4322.4x – 3744.1       | 0.9956                                    | 0.07        | 0.25        | 0.02             | 92.45             | 106.35               | 99.62              |
| 16        | 4.158                | Luteolin                  | 0.195–12.5           | y = 8381.9x – 5000.7       | 0.9945                                    | 0.015       | 0.050       | 0.0005           | 84.21             | 96.21                | 107.09             |
| 17        | 4.185                | Quercetin                 | 0.05–12.5            | y = 2934x + 917.17         | 0.9937                                    | 0.05        | 0.18        | 0.02             | 83.36             | 115.06               | 95.74              |

**Supplementary Table S2 (Cont.):**

The validation parameters of twenty-four authentic standards of phenolics using liquid chromatography–electrospray ionization–tandem mass spectrometry (LC-ESI-MS/MS) in selective reaction monitoring (SRM) mode.

| Compounds | Retention time (min) | Standards     | Linear range (µg/mL) | Linear regression equation | Correlation coefficient (R <sup>2</sup> ) | LOD (µg/mL) | LOQ (µg/mL) | %RSD (Inter-day) | %Recovery         |                      |                    |
|-----------|----------------------|---------------|----------------------|----------------------------|-------------------------------------------|-------------|-------------|------------------|-------------------|----------------------|--------------------|
|           |                      |               |                      |                            |                                           |             |             |                  | Low level (µg/mL) | Medium level (µg/mL) | High level (µg/mL) |
| 18        | 4.522                | Cinnamic acid | 0.039–10             | $y = 6631.9x - 866.59$     | 0.9964                                    | 0.049       | 0.163       | 0.016            | 101.94            | 98.84                | 95.85              |
| 19        | 4.689                | Apigenin      | 0.34–11              | $y = 1790.7x - 287.7$      | 0.9997                                    | 0.127       | 0.424       | 0.042            | 88.84             | 106.89               | 114.79             |
| 20        | 4.693                | Genistein     | 0.625–40             | $y = 1247.2x - 1747.1$     | 0.9977                                    | 0.049       | 0.163       | 0.016            | 95.33             | 101.49               | 11633              |
| 21        | 4.705                | Naringenin    | 0.0008–5             | $y = 16755x + 443.03$      | 0.9932                                    | 0.003       | 0.011       | 0.001            | 117.92            | 96.26                | 111.08             |
| 22        | 4.79                 | Kaempferol    | 0.25–10              | $y = 1006.8x - 346.28$     | 0.9905                                    | 0.122       | 0.406       | 0.041            | 92.35             | 107.69               | 102.17             |
| 23        | 4.878                | Isorhamnetin  | 0.0098–2.5           | $y = 12698x + 586.16$      | 0.9945                                    | 0.016       | 0.052       | 0.005            | 113.57            | 105.88               | 111.14             |
| 24        | 6.146                | Galangin      | 0.3125–40            | $y = 5012.1x - 9354.7$     | 0.9879                                    | 0.010       | 0.035       | 0.003            | 84.01             | 112.92               | 115.80             |

## Supplementary Table S3:

The scientific name, voucher specimen, folk medicine, plant biology and characterization, and physical appearance of the edible part of the plant samples.

| Scientific name/voucher specimen/edible parts/ folk medicine                                                                                                                                                                                                                                                                                                                                                                                  | Plant biology/characterization                                                                                                                                                                                                                                                                                                                                                                                                                                             | Physical appearance of the edible part                                                                                                                                             |
|-----------------------------------------------------------------------------------------------------------------------------------------------------------------------------------------------------------------------------------------------------------------------------------------------------------------------------------------------------------------------------------------------------------------------------------------------|----------------------------------------------------------------------------------------------------------------------------------------------------------------------------------------------------------------------------------------------------------------------------------------------------------------------------------------------------------------------------------------------------------------------------------------------------------------------------|------------------------------------------------------------------------------------------------------------------------------------------------------------------------------------|
| <p><i>Albizia lebbbeck</i> (L.) Benth</p> <p><b>Voucher specimens:</b> PBM-005664<br/> <b>Edible part:</b> Shoot and young leaves<br/> <b>Folk medicine [1]:</b> Leaves are used to cool the body and extinguish heated poisons.</p>                                                                                                                                                                                                          | <p>A medium-sized deciduous perennial tree, which grows to a height of 3–15 meters in plantations and up to 30 meters in the open. Bipinnate leaves have 3–11 pairs of brilliant green, oblong leaflets that are 1.5–6.5 cm long and 0.5–3.5 cm wide. Inflorescences are globular clusters of 15–40 fragrant white flowers in a globular shape. The fruits are reddish-brown pods with 5–15 flat rounded, free moving seeds that are 10–30 cm long x 3–6 cm wide [12].</p> |  <p>Young leaves and tender tips, light green color, and soft texture</p>                       |
| <p><i>Alpinia malaccensis</i> (Burm.) Roscoe</p> <p><b>Voucher specimens:</b> PBM-005663<br/> <b>Edible part:</b> Rhizome<br/> <b>Folk medicine [2]:</b> Underground rhizomes or stems have a spicy and bitter flavor and are used to treat gas, indigestion, colic, and as a carminative in women after childbirth. It is applied topically to relieve urticaria itching, joint discomfort and swelling, bruising, eczema, and chloasma.</p> | <p>This perennial-herbaceous plant has white, pungent, hot cinnamon-like scents rhizomes. Single leaves are arranged in a zigzag pattern, with edges that are parallel. White sub-flowers form a bouquet at the apex of 15–30 cm long blossoms, and the fruit is spherical once dried and can be broken out [13].</p>                                                                                                                                                      |  <p>Underground rhizomes, white color</p>                                                       |
| <p><i>Careya arborea</i> Roxb.</p> <p><b>Voucher specimens:</b> PBM-005656<br/> <b>Edible part:</b> Shoot and young leaves<br/> <b>Folk medicine [3, 4]:</b> Young leaves and tender tips are used to treat flatulence.</p>                                                                                                                                                                                                                   | <p>Medium-sized deciduous perennial tree with many branches and small stems. The leaves are placed in a cluster at the terminal of the branches in an upside-down oval form. The flower is a bouquet with four white petals, bell-shaped base sepals, and a circular green fruit with many seeds [14].</p>                                                                                                                                                                 |  <p>Young leaves and tender tips, light green and purple color, soft texture of the leaves</p> |

Note: The (—) indicates the scale of 1 cm.

## Supplementary Table S3 (Cont.):

The scientific name, voucher specimen, and physical appearance of the edible part of the samples.

| Scientific name/voucher specimen/edible parts/ folk medicine                                                                                                                                                                                                                                                                                                                                                                                   | Plant biology/characterization                                                                                                                                                                                                                                                                                                                                                                       | Physical appearance of the edible part                                                                                                                               |
|------------------------------------------------------------------------------------------------------------------------------------------------------------------------------------------------------------------------------------------------------------------------------------------------------------------------------------------------------------------------------------------------------------------------------------------------|------------------------------------------------------------------------------------------------------------------------------------------------------------------------------------------------------------------------------------------------------------------------------------------------------------------------------------------------------------------------------------------------------|----------------------------------------------------------------------------------------------------------------------------------------------------------------------|
| <p><i>Diplazium esculentum</i> (Retz.)</p> <p><b>Voucher specimens:</b> PBM-005654</p> <p><b>Edible part:</b> Shoot and young leaves</p> <p><b>Folk medicine [5]:</b> A decoction of <i>D. esculentum</i> is used by women as a tonic after childbirth and can be used to cure expectoration of blood and ordinary coughs.</p>                                                                                                                 | <p>This perennial vegetable fern has a creeping rhizome and thick black roots growing beneath the surface. Spirally borne leaves reach a height of 1 m or more and are compactly placed. Rhizome scales are around 1 cm long and have a narrow, tapering toothed shape. The pinnules are lanceolate, 5 cm long, and coarsely serrated. The leaves are 2- or 3-pinnate and 50 to 80 cm long [15].</p> |  <p>Tender curling leaves, fresh green color</p>                                  |
| <p><i>Kaempferia roscoeana</i> Wall.</p> <p><b>Voucher specimens:</b> PBM-005658</p> <p><b>Edible part:</b> Shoot and young leaves</p> <p><b>Folk medicine [6]:</b> No information on shoots and young leaves; however, rhizomes are used to pound and mask on the wound to neutralize insect bites.</p>                                                                                                                                       | <p>The perennial herbaceous plant with the small stem has only two leaves that are spread flat on the ground. The leaf is fairly spherical, green in hue, and bears dark green stripes. The blooms are white, and the petals of the white petals are pale yellow at the base of the petals, bunched between the leaf sheath [16].</p>                                                                |  <p>Fairly spherical leaf, green in hue, and bears dark green/purple stripes</p> |
| <p><i>Millettia brandisiana</i> Kurz.</p> <p><b>Voucher specimens:</b> PBM-005652</p> <p><b>Edible part:</b> Shoot and young leaves</p> <p><b>Folk medicine [7]:</b> No information on young leaves and tender tips; however, trunk is boiled with water and drink to nourish the blood, while bark is boiled with water used to cleanse chronic wounds. Heartwood is used as a tonic for blood, body nourishment, and improving appetite.</p> | <p>A deciduous tree that grows to be 10-20 meters tall, minimally branching, and smooth. Feather-like leaves. Blooms with a lot of purple-pink petals, similar to pea flowers. Oval flat pods are 2-2.5 cm wide and 7-8 cm long with pointy or rounded tip, thin hairs, and dark red-brown seeds [7].</p>                                                                                            |  <p>Young leaves and tender tips, light green and purple color</p>              |

Note: The (—) indicates the scale of 1 cm.

## Supplementary Table S3 (Cont.):

The scientific name, voucher specimen, and physical appearance of the edible part of the samples.

| Scientific name/voucher specimen/edible parts/ folk medicine                                                                                                                                                                                                                                                                                                                                                                                                                                                                                                                                                                                                                                            | Plant biology/characterization                                                                                                                                                                                                                                                                                                             | Physical appearance of the edible part                                                                                                                                                |
|---------------------------------------------------------------------------------------------------------------------------------------------------------------------------------------------------------------------------------------------------------------------------------------------------------------------------------------------------------------------------------------------------------------------------------------------------------------------------------------------------------------------------------------------------------------------------------------------------------------------------------------------------------------------------------------------------------|--------------------------------------------------------------------------------------------------------------------------------------------------------------------------------------------------------------------------------------------------------------------------------------------------------------------------------------------|---------------------------------------------------------------------------------------------------------------------------------------------------------------------------------------|
| <p><i>Momordica charantia</i></p> <p><b>Voucher specimens:</b> PBM-005659<br/> <b>Edible part:</b> Whole fruit<br/> <b>Folk medicine [8]:</b> Unripe fruits have a bitter flavor and can be used to treat fever (boil with water and drink). They are also useful for diabetes, nourishing elements, blemish mouth, nourishing bile, good appetite, nourishing menstrual blood and used as a moderate laxative.</p>                                                                                                                                                                                                                                                                                     | <p>This plant is a creeper with a single leaf, arranged in the alternate. The leaf shape is like a palm, wide-long 4-7 cm, with the edge of the concave around 5-7 deep edge. Flowers have yellow bell-shaped petals, while the fruit is fresh, bobbin-shaped, bumpy, and bitter [17].</p>                                                 |  <p>Young, green, unripe fruits</p>                                                                 |
| <p><i>Phyllanthus emblica</i> L.</p> <p><b>Voucher specimens:</b> PBM-005661<br/> <b>Edible part:</b> Flesh of the fruit (no seed)<br/> <b>Folk medicine [9]:</b> Ripe fruits have sour-astringent taste, which can reduce fever, diuretic, cough, cure phlegm, and moisten the throat. They can also nourish the heart, purify the blood, cure wind, and cure scurvy.</p>                                                                                                                                                                                                                                                                                                                              | <p>This deciduous tree has small to medium size. The leaves are simple, subsessile, and closely set along branchlets with light green color. The flowers are greenish-yellow. The fruit is nearly spherical, light greenish-yellow, with six vertical stripes or furrows. The taste of the fruit is sour, bitter, and astringent [18].</p> |  <p>Ripe fruits, nearly spherical, light greenish-yellow, with six vertical stripes or furrows</p> |
| <p><i>Zingiber cassumunar</i> Roxb.</p> <p><b>Voucher specimens:</b> PBM-005665<br/> <b>Edible part:</b> Rhizome<br/> <b>Folk medicine [10]:</b> Rhizomes or underground stems have astringent taste. It is a remedy for flatulence, indigestion, has a mild laxative effect, heals the intestines, cures toxins in the stomach, cures asthma, expels gas in the intestines, cures diarrhea, is used as a drug to help menstruate women after childbirth, reduces inflammation and swelling, cures diarrhea, relieves toothache, and cures vomiting blood. Fresh rhizomes are used as external medications, mashed to make oil, and used to treat beriberi, aches and pains, sprains, and swelling.</p> | <p>This perennial-herbaceous plant has tuberous furnished with long, white fleshy fibers and jointed like ginger but much larger. When fresh, it has a deep yellow color with a strong camphorated odor and a warm spicy, bitterest taste [19].</p>                                                                                        |  <p>Fresh rhizomes, yellow color inside, possessing a strong camphorated odor</p>                |

Note: The (—) indicates the scale of 1 cm.



## Supplementary Table S3 (Cont.):

The scientific name, voucher specimen, and physical appearance of the edible part of the samples.

| Scientific name/voucher specimen/edible parts/ folk medicine                                                                                                                                                                                                                               | Plant biology/characterization                                                                                                                                                                                                                                                                                                                                      | Physical appearance of the edible part                                                                                                                       |
|--------------------------------------------------------------------------------------------------------------------------------------------------------------------------------------------------------------------------------------------------------------------------------------------|---------------------------------------------------------------------------------------------------------------------------------------------------------------------------------------------------------------------------------------------------------------------------------------------------------------------------------------------------------------------|--------------------------------------------------------------------------------------------------------------------------------------------------------------|
| <p><i>Zingiber citriodorum</i> J.Mood &amp; T. Theleide Zingiber</p> <p><b>Voucher specimens:</b> PBM-005674</p> <p><b>Edible part:</b> Rhizome</p> <p><b>Folk medicine [11]:</b> Tubers can use as an ingredient for making chili paste. They can carminative and relieve flatulence.</p> | <p>This perennial-herbaceous plant has the underground rhizomes, which are yellow. Stems above the soil are about 50 cm high. The whole tree smells like lemon. The leaves are oblong, green, while the dorsal side is dark gray. The inflorescence is caused by rhizomes. An upright bouquet and the leaves are light green, but will turn red when aged [20].</p> |  <p>Underground tubers, yellow color inside, covering with pink peel</p> |

Note: The (—) indicates the scale of 1 cm.

## Supplementary Table S4:

The percentage of moisture content in edible part of fresh, freeze-dried and oven-dried plant samples.

| Samples                                          | Moisture content (%) |            |           |
|--------------------------------------------------|----------------------|------------|-----------|
|                                                  | Fresh                | Freeze-dry | Oven-dry  |
| <i>Albizia lebbbeck</i> (L.) Benth               | 72.3 ± 0.9           | 4.5 ± 0.3  | 5.5 ± 0.4 |
| <i>Alpinia malaccensis</i> (Burm.) Roscoe        | 36.5 ± 1.6           | 5.6 ± 0.1  | 5.7 ± 0.1 |
| <i>Careya arborea</i> Roxb.                      | 35.2 ± 0.5           | 6.5 ± 0.1  | 4.4 ± 0.1 |
| <i>Diplazium esculentum</i> (Retz.) Swartz       | 74.9 ± 0.4           | 4.7 ± 0.2  | 6.7 ± 0.2 |
| <i>Kaempferia roscoeana</i> Wall.                | 83.1 ± 1.2           | 6.7 ± 0.1  | 4.1 ± 0.1 |
| <i>Millettia brandisiana</i> Kurz.               | 70.9 ± 0.5           | 4.3 ± 0.3  | 5.8 ± 0.3 |
| <i>Momordica charantia</i>                       | 37.6 ± 1.5           | 6.9 ± 0.1  | NA        |
| <i>Phyllanthus emblica</i> L.                    | 82.0 ± 0.4           | 3.5 ± 0.4  | 3.2 ± 0.3 |
| <i>Zingiber cassumunar</i> Roxb.                 | 69.6 ± 2.3           | 6.8 ± 0.1  | 6.9 ± 0.1 |
| <i>Zingiber citriodorum</i> J.Mood & T. Theleide | 73.2 ± 1.4           | 7.0 ± 0.2  | 7.9 ± 0.1 |

N/A : Not available due to limited quantity of the sample.

## Supplementary Figure S1:

The liquid chromatography–electrospray ionization–tandem mass spectrometry (LC-ESI-MS/MS) chromatograms of twenty-four authentic standards of phenolics.

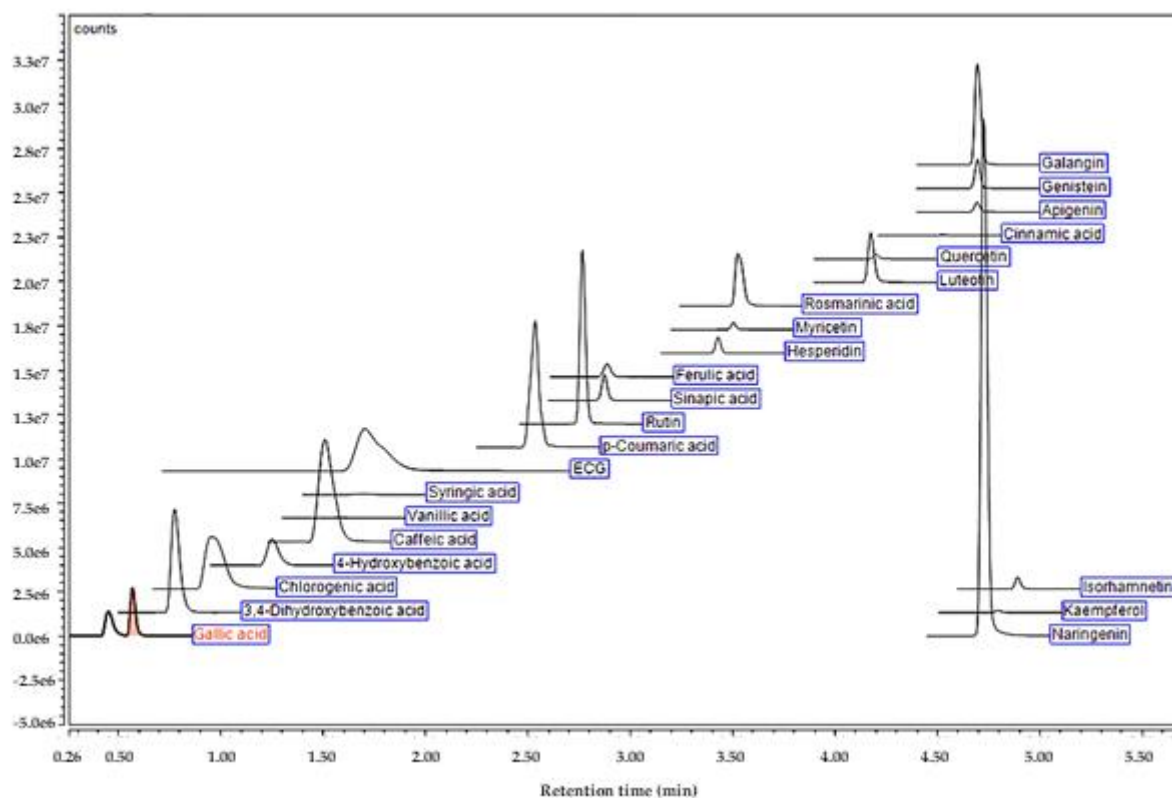

## Supplementary Figure S2:

The liquid chromatography–electrospray ionization–tandem mass spectrometry (LC-ESI-MS/MS) chromatograms of ten plant samples including (a) *Albizia lebbek* (L.) Benth, (b) *Alpinia malaccensis* (Burm.) Roscoe, (c) *Careya arborea* Roxb., (d) *Diplazium esculentum* (Retz.) Swartz, (e) *Kaempferia roscoeana* Wall., (f) *Millettia brandisiana* Kurz., (g) *Momordica charantia*, (h) *Phyllanthus emblica* L., (i) *Zingiber cassumunar* Roxb., and (j) *Zingiber citriodorum* J.Mood & T. Theleide.

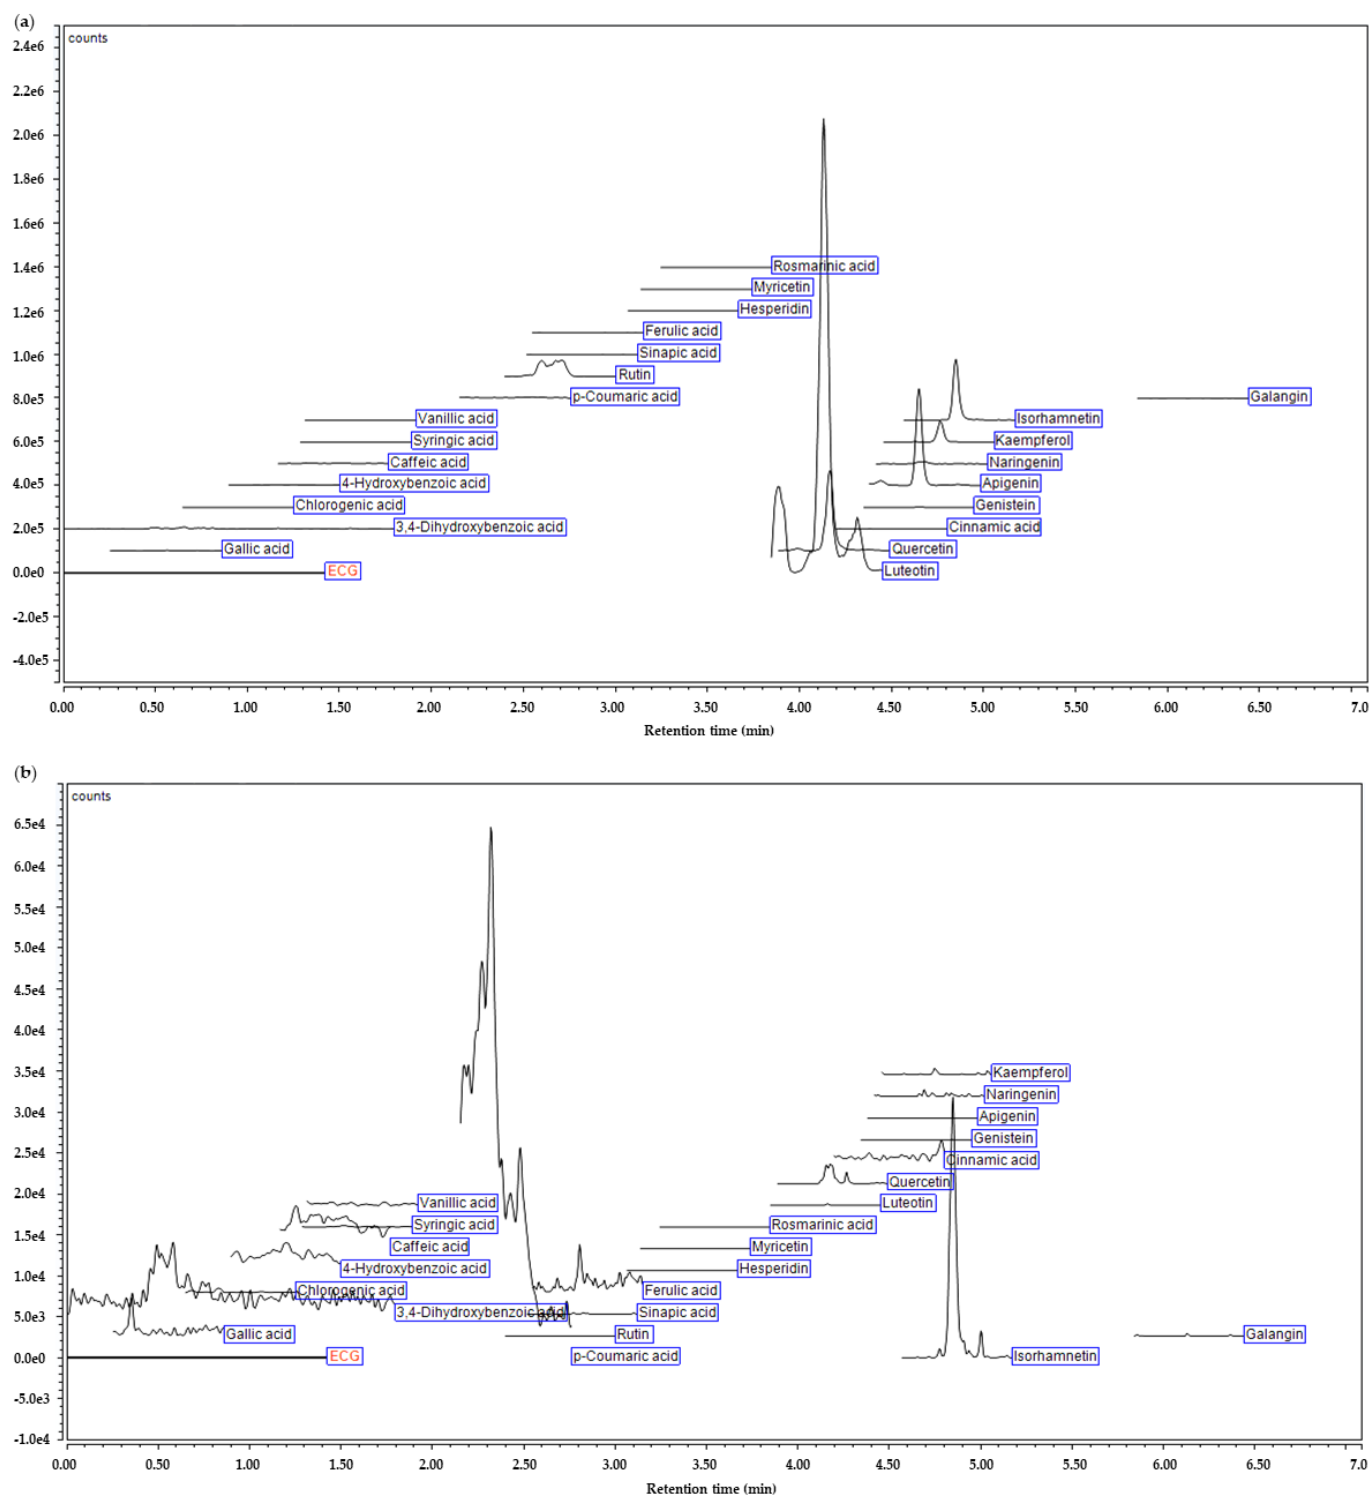

## Supplementary Figure S2 (Cont.):

The liquid chromatography–electrospray ionization–tandem mass spectrometry (LC-MS/MS) chromatograms of ten plant samples including (a) *Albizia lebbek* (L.) Benth, (b) *Alpinia malaccensis* (Burm.) Roscoe, (c) *Careya arborea* Roxb., (d) *Diplazium esculentum* (Retz.) Swartz, (e) *Kaempferia roscoeana* Wall., (f) *Millettia brandisiana* Kurz., (g) *Momordica charantia*, (h) *Phyllanthus emblica* L., (i) *Zingiber cassumunar* Roxb., and (j) *Zingiber citriodorum* J.Mood & T. Theleide.

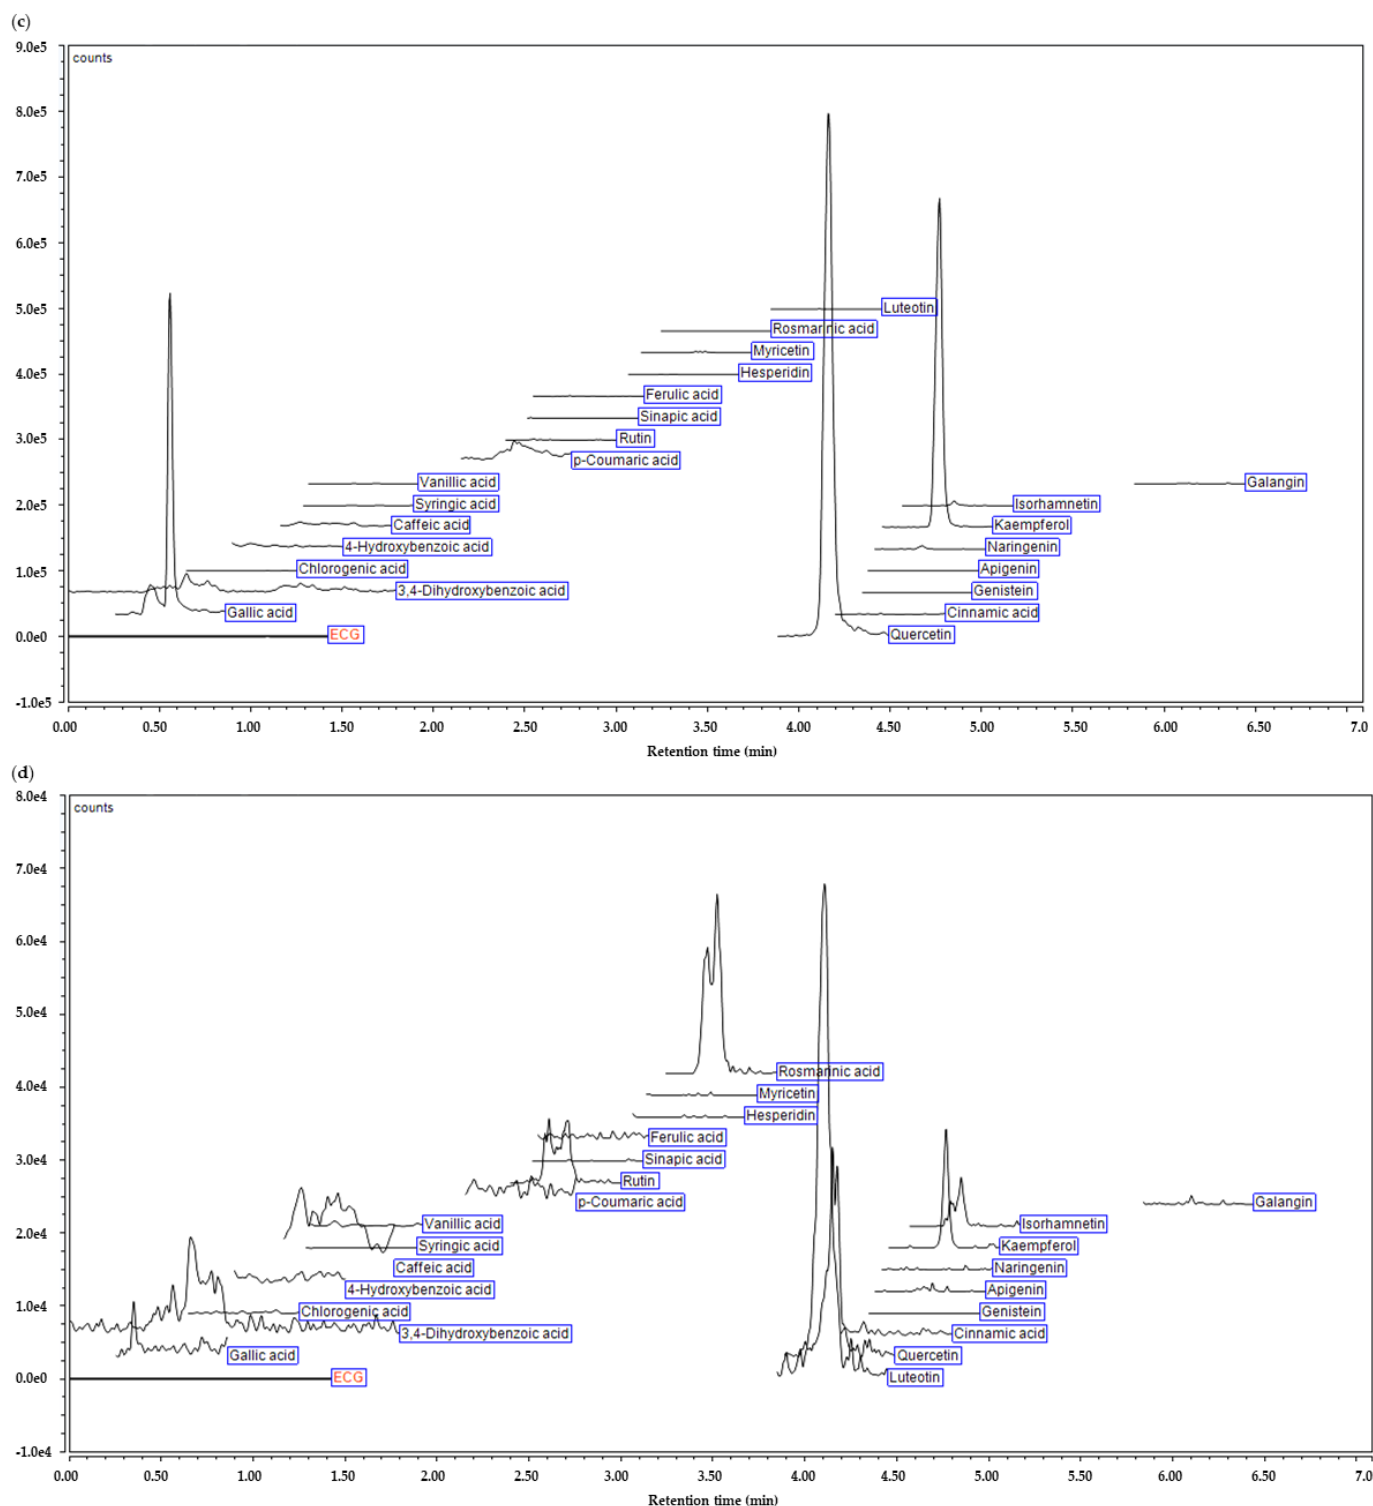

## Supplementary Figure S2 (Cont.):

The liquid chromatography–electrospray ionization–tandem mass spectrometry (LC-MS/MS) chromatograms of ten plant samples including (a) *Albizia lebbek* (L.) Benth, (b) *Alpinia malaccensis* (Burm.) Roscoe, (c) *Careya arborea* Roxb., (d) *Diplazium esculentum* (Retz.) Swartz, (e) *Kaempferia roscoeana* Wall., (f) *Millettia brandisiana* Kurz., (g) *Momordica charantia*, (h) *Phyllanthus emblica* L., (i) *Zingiber cassumunar* Roxb., and (j) *Zingiber citriodorum* J.Mood & T. Theleide.

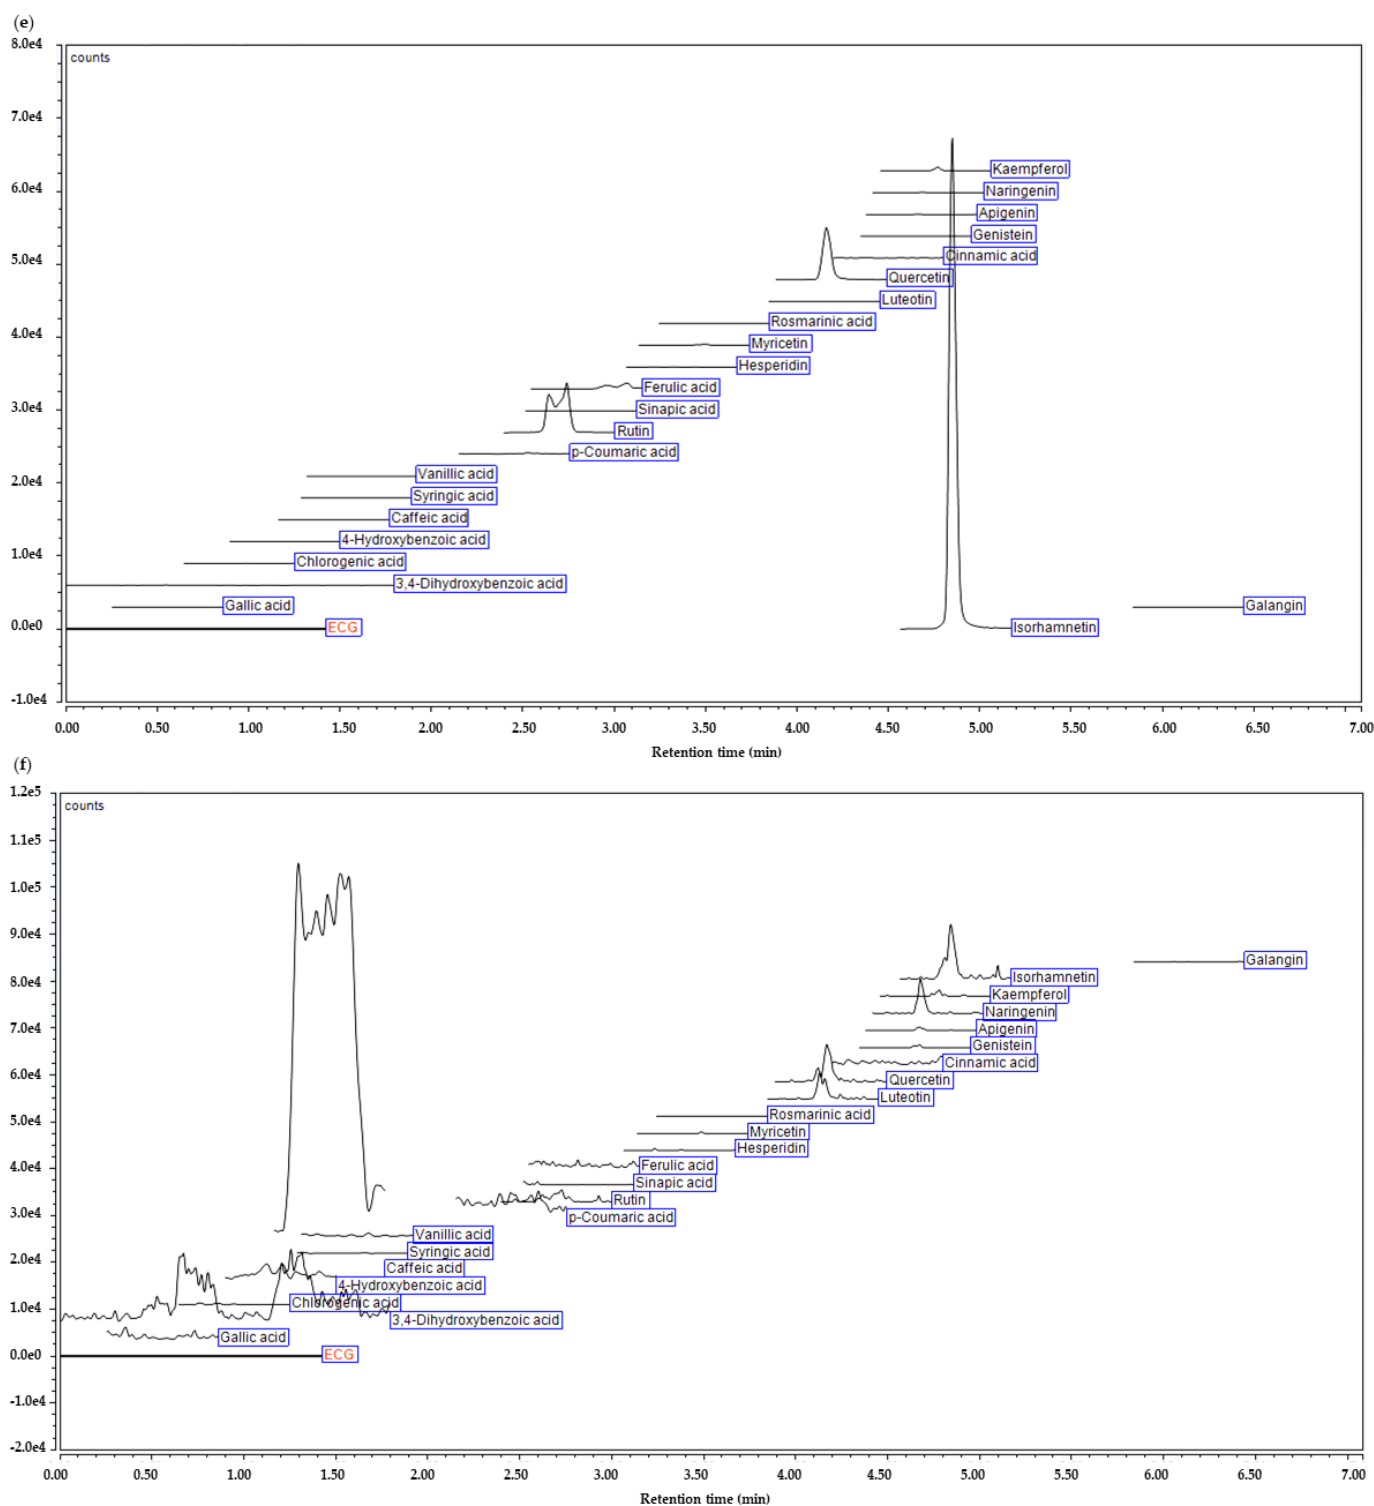

## Supplementary Figure S2 (Cont.):

The liquid chromatography–electrospray ionization–tandem mass spectrometry (LC-MS/MS) chromatograms of ten plant samples including (a) *Albizia lebbek* (L.) Benth, (b) *Alpinia malaccensis* (Burm.) Roscoe, (c) *Careya arborea* Roxb., (d) *Diplazium esculentum* (Retz.) Swartz, (e) *Kaempferia roscoeana* Wall., (f) *Millettia brandisiana* Kurz., (g) *Momordica charantia*, (h) *Phyllanthus emblica* L., (i) *Zingiber cassumunar* Roxb., and (j) *Zingiber citriodorum* J.Mood & T. Theleide.

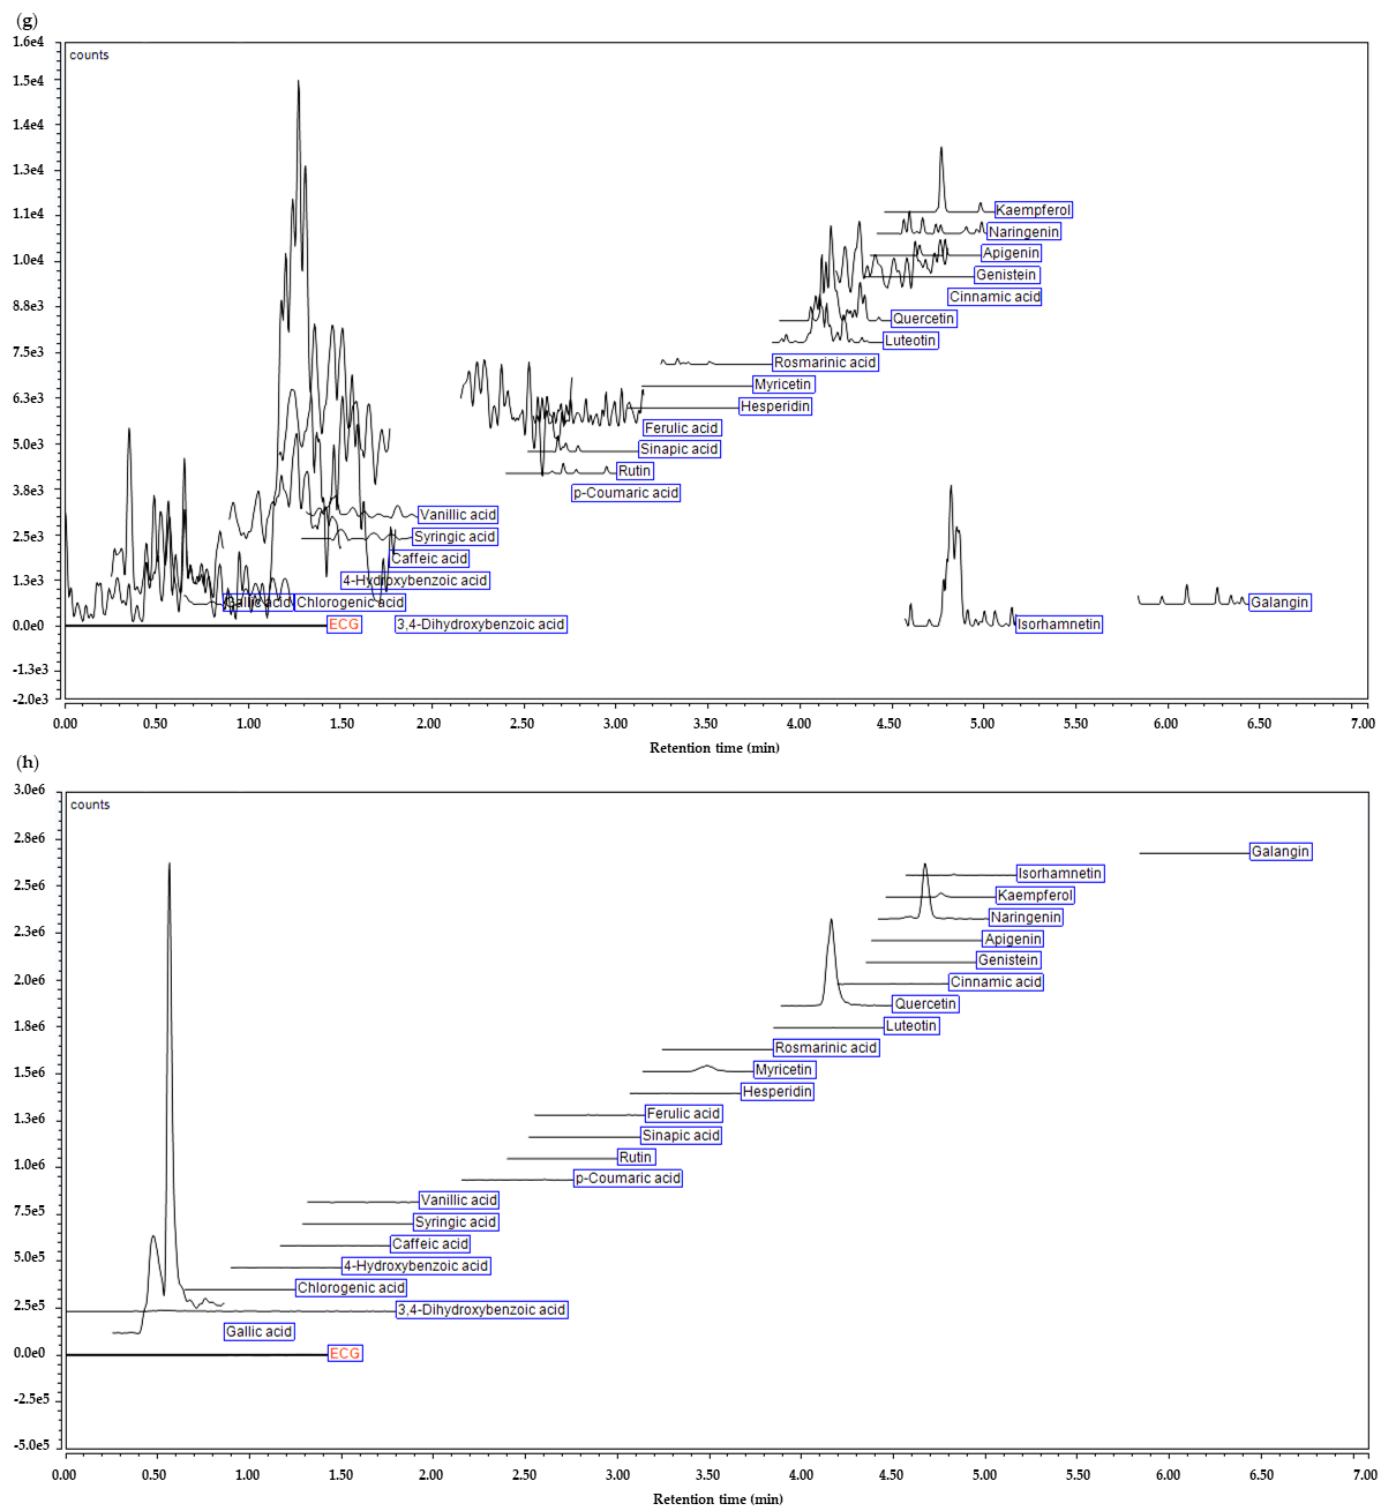

## Supplementary Figure S2 (Cont.):

The liquid chromatography–electrospray ionization–tandem mass spectrometry (LC-MS/MS) chromatograms of ten plant samples including (a) *Albizia lebbek* (L.) Benth, (b) *Alpinia malaccensis* (Burm.) Roscoe, (c) *Careya arborea* Roxb., (d) *Diplazium esculentum* (Retz.) Swartz, (e) *Kaempferia roscoeana* Wall., (f) *Millettia brandisiana* Kurz., (g) *Momordica charantia*, (h) *Phyllanthus emblica* L., (i) *Zingiber cassumunar* Roxb., and (j) *Zingiber citriodorum* J.Mood & T. Theleide.

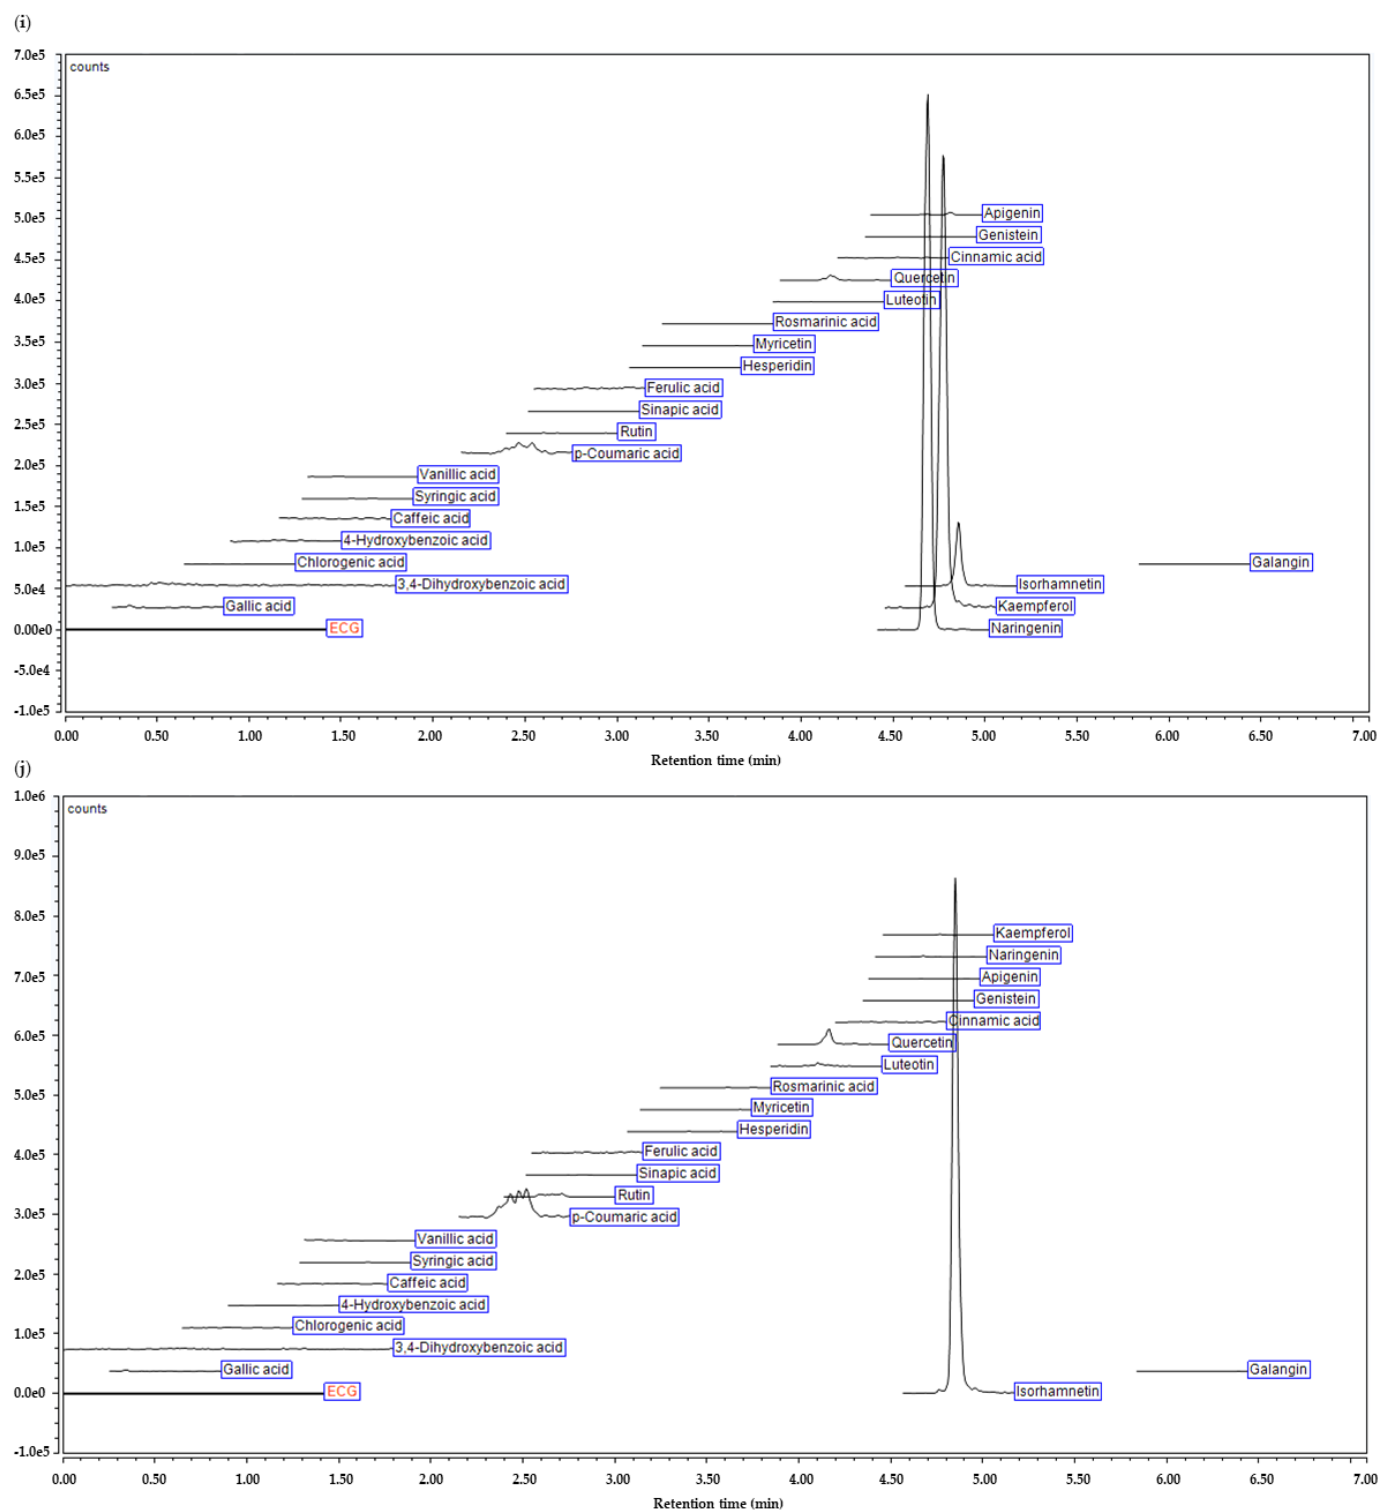



## References

1. Samunprai.com. Herb database “*Albizia lebbek* (Linn.) Benth”. 2021. Available from: <https://www.samunpri.com/พฤษภ/>.
2. Medicinal plant information, F.o.P., Silpakorn University. *Alpinia galanga* (L.) Willd. 2021; Available from: [http://pharmacy.su.ac.th/herbmed/herb/text/herb\\_detail.php?herbID=56](http://pharmacy.su.ac.th/herbmed/herb/text/herb_detail.php?herbID=56).
3. The botanical garden organization, M.o.N.R.a.E., Thailand. BGO Plant databases “*Careya arborea* Roxb.”. 2021 [cited 2021-30-12]; Available from: [http://www.qsb.org/database/Botanic\\_Book%20full%20option/search\\_detail.asp?botanic\\_id=2858](http://www.qsb.org/database/Botanic_Book%20full%20option/search_detail.asp?botanic_id=2858).
4. Medicinal plant information, F.o.P., Silpakorn University. *Careya sphaeice* Roxb. 2021; Available from: [http://pharmacy.su.ac.th/herbmed/herb/text/herb\\_detail.php?herbID=449](http://pharmacy.su.ac.th/herbmed/herb/text/herb_detail.php?herbID=449).
5. De Winter, W.; Amoroso, V. Plant Resources of South-East Asia. Cryptogams: ferns and fern allies. 2003, 15(2).
6. Samunprai.com. Herb database “*Milettia Brandisiana* KURZ”. 2021; Available from: <https://www.samunpri.com/กระพี้จั่น/>.
7. Medicinal plant information, F.o.P., Silpakorn University. *Kaempferia roscoeana* Wall. 2021; Available from: [http://pharmacy.su.ac.th/herbmed/herb/text/herb\\_detail.php?herbID=375](http://pharmacy.su.ac.th/herbmed/herb/text/herb_detail.php?herbID=375).
8. Medicinal plant information, F.o.P., Silpakorn University. *Momordica charantia* L. 2021; Available from: [http://pharmacy.su.ac.th/herbmed/herb/text/herb\\_detail.php?herbID=182](http://pharmacy.su.ac.th/herbmed/herb/text/herb_detail.php?herbID=182).
9. Medicinal plant information, F.o.P., Silpakorn University. *Phyllanthus emblica* L. 2021; Available from: [http://pharmacy.su.ac.th/herbmed/herb/text/herb\\_detail.php?herbID=176](http://pharmacy.su.ac.th/herbmed/herb/text/herb_detail.php?herbID=176).
10. Medicinal plant information, F.o.P., Silpakorn University. *Zingiber cassumunar* Roxb. 2021; Available from: [http://pharmacy.su.ac.th/herbmed/herb/text/herb\\_detail.php?herbID=163](http://pharmacy.su.ac.th/herbmed/herb/text/herb_detail.php?herbID=163).
11. Inthachoo, P. *Zingiber citriodorum* Theilade & Mood. Edible plants and Herb, Bangkok Herbarium (BK). 2018, 2.
12. Heuzé V.T.G.; Sauvant D. Lebbek (*Albizia lebbek*). Feedipedia, a programme by INRA, CIRAD, AFZ and FAO. 2015, Available from: <https://www.feedipedia.org/node/334>.
13. The botanical garden organization, M.o.N.R.a.E., Thailand. BGO Plant databases “*Alpinia malaccensis*”. 2017, Available from: [http://www.qsb.org/Database/Botanic\\_Book%20full%20option/Search\\_detail.asp?Botanic\\_ID=2845](http://www.qsb.org/Database/Botanic_Book%20full%20option/Search_detail.asp?Botanic_ID=2845).
14. Sirindhorn, T.P.G.C.P.u.t.R.I.o.H.R.H.P.M.C. *Careya arborea* Roxb. Plant databases; Available from: [http://www.rspg.or.th/plants\\_data/plantdat/lecythid/csphae\\_2.htm](http://www.rspg.or.th/plants_data/plantdat/lecythid/csphae_2.htm).
15. Sirindhorn, B.U.o.t.P.G.C.P.u.t.R.I.o.H.R.H.P.M.C. Plant databaese “*Diplazium esculentum* (Retz.) Sw”. 2020, Available from: [http://www.rspg.or.th/plants\\_data/plantdat/athyriac/descul\\_1.htm](http://www.rspg.or.th/plants_data/plantdat/athyriac/descul_1.htm).
16. The botanical garden organization, M.o.N.R.a.E., Thailand. BGO Plant databases “*Kaempferia roscoeana* Wall.”. 2017, Available from: [http://www.qsb.org/Database/Botanic\\_Book%20full%20option/search\\_detail.asp?botanic\\_id=2959](http://www.qsb.org/Database/Botanic_Book%20full%20option/search_detail.asp?botanic_id=2959).
17. Herbal Information Office, F.o.P., Mahidol University. “CUCURBITACEAE *Momordica charantia* L.”. 2020, Available from: [http://www.medplant.mahidol.ac.th/pharm/botanic.asp?bc=0527&kw=%C1%D0%C3%D0%A2%D5%E9%B9%A1\\*](http://www.medplant.mahidol.ac.th/pharm/botanic.asp?bc=0527&kw=%C1%D0%C3%D0%A2%D5%E9%B9%A1*)
18. Plants For A Future. Edible Shrubs: *Phyllanthus emblica* - L. 2020, Available from: <https://pfaf.org/user/Plant.aspx?LatinName=Phyllanthus+emblica#:~:text=Emblic%20or%20Phyllanthus%20emblica%20is,about%2035%20cm%20in%20diameter>.
19. Ethnobotany, Phytochemistry and Pharmacology of *Zingiber cassumunar* Roxb. (Zingiberaceae). 2020, Available from: [https://www.researchgate.net/publication/287674414\\_Ethnobotany\\_Phytochemistry\\_and\\_Pharmacology\\_of\\_Zingiber\\_cassumunar\\_Roxb\\_Zingiberaceae](https://www.researchgate.net/publication/287674414_Ethnobotany_Phytochemistry_and_Pharmacology_of_Zingiber_cassumunar_Roxb_Zingiberaceae).
20. The botanical garden organization, M.o.N.R.a.E., Thailand. BGO Plant databases “*Zingiber citriodorum* Theilade & Mood”. 2017, Available from: [http://www.qsb.org/Database/Botanic\\_Book%20full%20option/search\\_detail.asp?Botanic\\_ID=2962](http://www.qsb.org/Database/Botanic_Book%20full%20option/search_detail.asp?Botanic_ID=2962).
